# Supplementary material for: Effect of Autochthonous Lactic Acid Bacteria-Enhanced Fermentation on the Quality of Suancai
Source: MDPI journal article supplement (doi:10.3390/foods11213310), 2022-10-22
Supplement: s1 [file s1]

**Table S1** The concentration of volatile flavor compounds in Suancai fermented with different LABs

| NO. | Compounds                                    | RI   | Formula                                        | CON                      | LP                        | LB                        | LM                        |
|-----|----------------------------------------------|------|------------------------------------------------|--------------------------|---------------------------|---------------------------|---------------------------|
| C01 | Acetic acid                                  | 1453 | C <sub>2</sub> H <sub>4</sub> O <sub>2</sub>   | nd                       | 0.202±0.101 <sup>a</sup>  | 0.148±0.062 <sup>a</sup>  | 0.124±0.134 <sup>a</sup>  |
| C02 | Dimethyl trisulfide                          | 1344 | C <sub>2</sub> H <sub>6</sub> S <sub>3</sub>   | nd                       | 0.008±0.005               | nd                        | nd                        |
| C03 | 1,1-Dicyanoethane                            | 1237 | C <sub>4</sub> H <sub>4</sub> N <sub>2</sub>   | nd                       | nd                        | 0.029±0.025               | nd                        |
| C04 | 4-Isothiocyanato-1-Butene                    | 1433 | C <sub>5</sub> H <sub>7</sub> NS               | 0.140±0.014 <sup>b</sup> | 0.469±0.191 <sup>ab</sup> | 0.556±0.220 <sup>ab</sup> | 1.554±0.907 <sup>a</sup>  |
| C05 | 5-Cyano-1-pentene                            | 1332 | C <sub>6</sub> H <sub>9</sub> N                | 0.033±0.023 <sup>b</sup> | 0.097±0.048 <sup>ab</sup> | 0.256±0.073 <sup>a</sup>  | 0.189±0.103 <sup>ab</sup> |
| C06 | 1-Cyano-4,5-epithiopentane                   | 2079 | C <sub>6</sub> H <sub>9</sub> NS               | nd                       | 0.847±0.337 <sup>a</sup>  | 0.396±0.498 <sup>a</sup>  | 2.352±1.337 <sup>a</sup>  |
| C07 | 3-Hexen-1-ol                                 | 1383 | C <sub>6</sub> H <sub>12</sub> O               | nd                       | 0.010±0.007 <sup>a</sup>  | 0.021±0.003 <sup>a</sup>  | 0.016±0.023 <sup>a</sup>  |
| C08 | 1-Hexanol                                    | 1354 | C <sub>6</sub> H <sub>14</sub> O               | nd                       | 0.012±0.009 <sup>a</sup>  | 0.014±0.010 <sup>a</sup>  | 0.010±0.010 <sup>a</sup>  |
| C09 | Benzonitrile                                 | 1584 | C <sub>7</sub> H <sub>5</sub> N                | nd                       | 0.064±0.046               | nd                        | nd                        |
| C10 | Benzaldehyde                                 | 1307 | C <sub>7</sub> H <sub>6</sub> O                | nd                       | 0.004±0.006 <sup>a</sup>  | 0.199±0.281 <sup>a</sup>  | 0.047±0.066 <sup>a</sup>  |
| C11 | Butanedioic acid, methylene-, dimethyl ester | 1097 | C <sub>7</sub> H <sub>10</sub> O <sub>4</sub>  | 0.223±0.034              | nd                        | nd                        | nd                        |
| C12 | 8-Oxabicyclo[5.1.0]octane                    | 1677 | C <sub>7</sub> H <sub>12</sub> O               | nd                       | 0.061±0.042               | nd                        | nd                        |
| C13 | 6-(Methylthio)hexanenitrile                  | 2052 | C <sub>7</sub> H <sub>13</sub> NS              | nd                       | nd                        | 0.105±0.042 <sup>a</sup>  | 0.067±0.038 <sup>a</sup>  |
| C14 | Berteroin                                    | 2263 | C <sub>7</sub> H <sub>13</sub> NS <sub>2</sub> | nd                       | 0.063±0.016 <sup>a</sup>  | 0.113±0.028 <sup>a</sup>  | 0.132±0.080 <sup>a</sup>  |
| C15 | 1-Heptanol                                   | 1448 | C <sub>7</sub> H <sub>16</sub> O               | nd                       | 0.011±0.008               | nd                        | nd                        |
| C16 | 2-Amino-4-methyl-Benzoic acid                | 949  | C <sub>8</sub> H <sub>9</sub> NO <sub>2</sub>  | 0.183±0.110 <sup>a</sup> | 0.333±0.352 <sup>a</sup>  | 0.158±0.172 <sup>a</sup>  | nd                        |
| C17 | Phenylethyl Alcohol                          | 1698 | C <sub>8</sub> H <sub>10</sub> O               | nd                       | 0.012±0.011 <sup>a</sup>  | 0.019±0.017 <sup>a</sup>  | 0.022±0.014 <sup>a</sup>  |

|     |                                         |      |                                                |                          |                           |                          |                           |
|-----|-----------------------------------------|------|------------------------------------------------|--------------------------|---------------------------|--------------------------|---------------------------|
| C18 | (E)-2-Octenal                           | 1476 | C <sub>8</sub> H <sub>14</sub> O               | nd                       | 0.044±0.034 <sup>a</sup>  | 0.036±0.015 <sup>a</sup> | 0.028±0.015 <sup>a</sup>  |
| C19 | 1-Octen-3-ol                            | 1442 | C <sub>8</sub> H <sub>16</sub> O               | nd                       | 0.032±0.023 <sup>a</sup>  | 0.036±0.027 <sup>a</sup> | nd                        |
| C20 | (E)-2-Octen-1-ol                        | 1599 | C <sub>8</sub> H <sub>16</sub> O               | nd                       | 0.045±0.064 <sup>a</sup>  | nd                       | 0.074±0.038 <sup>a</sup>  |
| C21 | Octanoic acid                           | 1852 | C <sub>8</sub> H <sub>16</sub> O <sub>2</sub>  | nd                       | 0.109±0.040               | nd                       | nd                        |
| C22 | 1-Octanol                               | 1545 | C <sub>8</sub> H <sub>18</sub> O               | 0.053±0.017 <sup>b</sup> | 0.067±0.035 <sup>b</sup>  | 0.199±0.087 <sup>a</sup> | 0.081±0.045 <sup>ab</sup> |
| C23 | Benzenepropanenitrile                   | 2032 | C <sub>9</sub> H <sub>9</sub> N                | 0.011±0.016 <sup>b</sup> | 0.149±0.060 <sup>ab</sup> | 0.254±0.094 <sup>a</sup> | 0.206±0.114 <sup>a</sup>  |
| C24 | (2-isothiocyanatoethyl)-Benzene         | 2225 | C <sub>9</sub> H <sub>9</sub> NS               | 0.098±0.020 <sup>a</sup> | 0.362±0.112 <sup>a</sup>  | 0.789±0.295 <sup>a</sup> | 0.933±0.527 <sup>a</sup>  |
| C25 | 2,4-dimethyl-Benzaldehyde               | 1797 | C <sub>9</sub> H <sub>10</sub> O               | nd                       | 0.066±0.093 <sup>a</sup>  | 0.259±0.195 <sup>a</sup> | 0.306±0.221 <sup>a</sup>  |
| C26 | Isophorone                              | 1575 | C <sub>9</sub> H <sub>14</sub> O               | nd                       | 0.179±0.144 <sup>a</sup>  | 0.151±0.046 <sup>a</sup> | 0.119±0.065 <sup>a</sup>  |
| C27 | 3,5,5-trimethyl-2-Hexene                | 1276 | C <sub>9</sub> H <sub>18</sub>                 | nd                       | 0.002±0.002 <sup>a</sup>  | 0.078±0.110 <sup>a</sup> | nd                        |
| C28 | (6Z)-Nonen-1-ol                         | 1171 | C <sub>9</sub> H <sub>18</sub> O               | 0.029±0.022              | nd                        | nd                       | nd                        |
| C29 | 1-Nonanol                               | 1647 | C <sub>9</sub> H <sub>20</sub> O               | nd                       | 0.081±0.049 <sup>a</sup>  | 0.049±0.021 <sup>a</sup> | 0.037±0.018 <sup>a</sup>  |
| C30 | Naphthalene                             | 1716 | C <sub>10</sub> H <sub>8</sub>                 | nd                       | nd                        | 0.057±0.041              | nd                        |
| C31 | 4-propyl-Benzaldehyde                   | 1617 | C <sub>10</sub> H <sub>12</sub> O              | 0.021±0.016 <sup>a</sup> | 0.002±0.003 <sup>a</sup>  | 0.017±0.025 <sup>a</sup> | nd                        |
| C32 | 1,2,4,5-tetramethyl-Benzene             | 1404 | C <sub>10</sub> H <sub>14</sub>                | nd                       | nd                        | 0.062±0.073              | nd                        |
| C33 | 3-Methylene-1-oxa-spiro[4.5]decan-2-one | 1995 | C <sub>10</sub> H <sub>14</sub> O <sub>2</sub> | nd                       | 0.016±0.007 <sup>a</sup>  | 0.027±0.007 <sup>a</sup> | 0.021±0.011 <sup>a</sup>  |
| C34 | 3,7-dimethyl-1,3,7-Octatriene           | 1026 | C <sub>10</sub> H <sub>16</sub>                | nd                       | 0.019±0.004 <sup>a</sup>  | 0.051±0.027 <sup>a</sup> | 0.021±0.018 <sup>a</sup>  |
| C35 | 2,6-dimethyl-2,4,6-Octatriene           | 1339 | C <sub>10</sub> H <sub>16</sub>                | nd                       | 0.022±0.010 <sup>a</sup>  | 0.011±0.008 <sup>a</sup> | nd                        |
| C36 | β-Myrcene                               | 1143 | C <sub>10</sub> H <sub>16</sub>                | nd                       | 0.033±0.016 <sup>a</sup>  | 0.085±0.044 <sup>a</sup> | 0.071±0.042 <sup>a</sup>  |

|       |                                      |      |                                                |                           |                           |                           |                           |
|-------|--------------------------------------|------|------------------------------------------------|---------------------------|---------------------------|---------------------------|---------------------------|
| C37   | trans, trans-Octa-2,4-dienyl acetate | 1671 | C <sub>10</sub> H <sub>16</sub> O <sub>2</sub> | nd                        | 0.075±0.050 <sup>a</sup>  | 0.049±0.016 <sup>a</sup>  | 0.060±0.030 <sup>a</sup>  |
| C38   | (Z)- 3,7-dimethyl-2,6-Octadien-1-ol  | 1846 | C <sub>10</sub> H <sub>18</sub> O              | 0.031±0.044 <sup>a</sup>  | nd                        | nd                        | 0.102±0.061 <sup>a</sup>  |
| C39   | Geraniol                             | 1845 | C <sub>10</sub> H <sub>18</sub> O              | nd                        | 0.070±0.026 <sup>b</sup>  | 0.153±0.048 <sup>a</sup>  | nd                        |
| C40   | Linalool                             | 1338 | C <sub>10</sub> H <sub>18</sub> O              | 0.043±0.061 <sup>ab</sup> | 0.008±0.011 <sup>b</sup>  | 0.132±0.059 <sup>a</sup>  | 0.082±0.047 <sup>ab</sup> |
| C41   | Citronellol                          | 1228 | C <sub>10</sub> H <sub>20</sub> O              | 0.007±0.005               | nd                        | nd                        | nd                        |
| C42   | Decanal                              | 1206 | C <sub>10</sub> H <sub>20</sub> O              | 0.003±0.002               | nd                        | nd                        | nd                        |
| C43   | Dodecanoic acid                      | 2271 | C <sub>12</sub> H <sub>24</sub> O <sub>2</sub> | nd                        | 0.011±0.004               | nd                        | nd                        |
| C44   | 1-Dodecanol                          | 1763 | C <sub>12</sub> H <sub>26</sub> O              | nd                        | 0.028±0.012 <sup>a</sup>  | 0.019±0.026 <sup>a</sup>  | nd                        |
| C45   | 2,4-Di-tert-butylphenol              | 2297 | C <sub>14</sub> H <sub>22</sub> O              | 0.153±0.020 <sup>a</sup>  | 0.062±0.017 <sup>a</sup>  | 0.131±0.028 <sup>a</sup>  | 0.224±0.170 <sup>a</sup>  |
| C46   | 2,6-Di-Tert-Butyl-4-Methylphenol     | 1513 | C <sub>15</sub> H <sub>24</sub> O              | 0.022±0.002               | nd                        | nd                        | nd                        |
| C47   | 4,6-di-tert-Butyl-m-cresol           | 2090 | C <sub>15</sub> H <sub>24</sub> O              | nd                        | nd                        | 0.015±0.021 <sup>a</sup>  | 0.016±0.016 <sup>a</sup>  |
| C48   | Butylated Hydroxytoluene             | 1898 | C <sub>15</sub> H <sub>24</sub> O              | nd                        | 0.030±0.014 <sup>a</sup>  | 0.037±0.024 <sup>a</sup>  | 0.018±0.020 <sup>a</sup>  |
| C49   | n-Hexadecanoic acid                  | 2697 | C <sub>16</sub> H <sub>32</sub> O <sub>2</sub> | nd                        | 0.031±0.010               | nd                        | nd                        |
| C50   | Heptadecane                          | 1700 | C <sub>17</sub> H <sub>36</sub>                | 0.014±0.004               | nd                        | nd                        | nd                        |
| Total |                                      |      |                                                | 1.065±0.096 <sup>b</sup>  | 3.739±1.666 <sup>ab</sup> | 4.710±0.878 <sup>ab</sup> | 6.913±3.899 <sup>a</sup>  |

The concentrations were calculated through an internal standard method (mg/kg)

Values are means ± standard deviation. Different superscript letters in a row indicate significant differences (p < 0.05).

nd, not detected.

CON, natural fermented Suancai. LP, LB and LM represent the inoculated Suancai with *Lb. plantarum*, *Lb. brevis* and *Leu. mesenteroides*.
