# Supplementary material for: Effect of Autochthonous Lactic Acid Bacteria-Enhanced Fermentation on the Quality of Suancai
Source: MDPI journal article supplement (doi:10.3390/foods11213310), 2022-10-22
Supplement: s1 [file s1]

**Table S2** The concentration of free amino acid in Suancai fermented with different autochthonous LABs.

| Samples | CON                        | LP                         | LB                         | LM                         |
|---------|----------------------------|----------------------------|----------------------------|----------------------------|
| Asp     | 17.19 ± 0.09 <sup>a</sup>  | 8.62 ± 0.03 <sup>b</sup>   | 7.19 ± 0.02 <sup>d</sup>   | 7.79 ± 0.08 <sup>c</sup>   |
| Thr     | 84.68 ± 0.31 <sup>a</sup>  | 73.84 ± 0.73 <sup>b</sup>  | 44.80 ± 0.28 <sup>c</sup>  | 45.15 ± 0.25 <sup>c</sup>  |
| Ser     | 9.82 ± 0.06 <sup>b</sup>   | 10.50 ± 0.02 <sup>a</sup>  | 9.80 ± 0.08 <sup>b</sup>   | 7.30 ± 0.07 <sup>c</sup>   |
| Glu     | 26.11 ± 0.04 <sup>c</sup>  | 28.65 ± 0.08 <sup>b</sup>  | 30.20 ± 0.14 <sup>a</sup>  | 22.86 ± 0.26 <sup>d</sup>  |
| Pro     | 5.76 ± 0.02 <sup>d</sup>   | 20.67 ± 0.30 <sup>b</sup>  | 21.87 ± 0.29 <sup>a</sup>  | 16.77 ± 0.16 <sup>c</sup>  |
| Gly     | 8.12 ± 0.02 <sup>a</sup>   | 6.03 ± 0.02 <sup>b</sup>   | 5.23 ± 0.03 <sup>c</sup>   | 4.77 ± 0.05 <sup>d</sup>   |
| Ala     | 41.86 ± 0.09 <sup>a</sup>  | 33.69 ± 0.11 <sup>b</sup>  | 29.39 ± 0.16 <sup>c</sup>  | 21.92 ± 0.26 <sup>d</sup>  |
| Cys     | 0.91 ± 0.01 <sup>a</sup>   | 0.07 ± 0.00 <sup>b</sup>   | nd                         | 0.07 ± 0.00 <sup>c</sup>   |
| Val     | 10.91 ± 0.01 <sup>a</sup>  | 7.75 ± 0.02 <sup>b</sup>   | 6.88 ± 0.02 <sup>c</sup>   | 6.27 ± 0.07 <sup>d</sup>   |
| Met     | 1.51 ± 0.00 <sup>a</sup>   | 1.13 ± 0.01 <sup>b</sup>   | 0.89 ± 0.02 <sup>c</sup>   | 0.83 ± 0.01 <sup>d</sup>   |
| Ile     | 7.27 ± 0.01 <sup>a</sup>   | 4.53 ± 0.01 <sup>b</sup>   | 3.67 ± 0.02 <sup>c</sup>   | 3.38 ± 0.04 <sup>d</sup>   |
| Leu     | 10.72 ± 0.02 <sup>a</sup>  | 8.18 ± 0.30 <sup>b</sup>   | 7.05 ± 0.02 <sup>c</sup>   | 6.31 ± 0.10 <sup>d</sup>   |
| Tyr     | 0.30 ± 0.00 <sup>c</sup>   | 4.07 ± 0.47 <sup>a</sup>   | 3.16 ± 0.01 <sup>b</sup>   | 3.04 ± 0.19 <sup>b</sup>   |
| Phe     | 5.88 ± 0.05 <sup>d</sup>   | 61.76 ± 0.91 <sup>b</sup>  | 67.05 ± 0.33 <sup>a</sup>  | 41.12 ± 0.40 <sup>c</sup>  |
| Lys     | 15.55 ± 0.00 <sup>a</sup>  | 3.34 ± 0.24 <sup>b</sup>   | 1.94 ± 0.00 <sup>d</sup>   | 2.31 ± 0.02 <sup>c</sup>   |
| His     | 5.55 ± 0.02 <sup>a</sup>   | 1.53 ± 0.06 <sup>b</sup>   | 1.38 ± 0.00 <sup>c</sup>   | 1.13 ± 0.01 <sup>d</sup>   |
| Arg     | nd                         | 6.45 ± 0.04 <sup>a</sup>   | nd                         | nd                         |
| Total   | 251.14 ± 0.68 <sup>b</sup> | 280.81 ± 1.71 <sup>a</sup> | 240.50 ± 0.99 <sup>c</sup> | 191.02 ± 1.67 <sup>d</sup> |

Values are means ± standard deviation and are expressed as mg/L. Different superscript letters in a row indicate significant differences ( $p < 0.05$ ). CON, natural fermented Suancai. LP, LB and LM represent the inoculated Suancai with *Lb. plantarum*, *Lb. brevis* and *Leu. mesenteroides*.
